# Supplementary material for: The key role of –CH3 steric hindrance in bis(pyrazolyl) ligand on polyoxometalate-based compounds
Source: Royal Society of Chemistry journal article supplement (doi:10.1039/c4dt00107a), 2014-01-01
Supplement: c4dt00107a1.pdf [file c4dt00107a1.pdf]

Supplementary Material (ESI) for Dalton Transactions  
This journal is © The Royal Society of Chemistry

## The Key Role of $-\text{CH}_3$ Steric Hindrance in Bis(pyrazolyl) Ligand on Polyoxometalate-based Compounds

Ai-xiang Tian\*, Yang Yang, Jun Ying, Na Li, Xiao-ling Lin, Ju-wen Zhang, Xiu-  
li Wang\*

*Department of Chemistry, Bohai University, Jinzhou 121000, People's Republic of  
China*

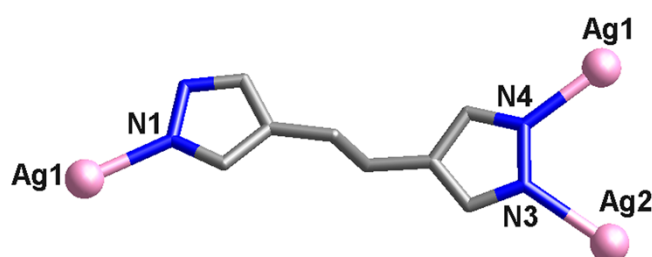

**Fig. S1** The coordination mode of Hbhpe in compound **1**.

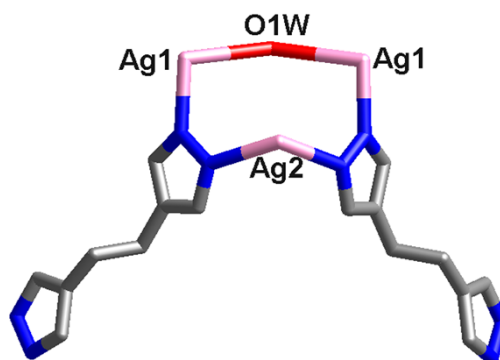

**Fig. S2** The tri-nuclear Ag cluster constructed by two adjacent Hbhpe ligands through sharing the same Ag2 ion and the linkage of O1W molecule in compound **1**.

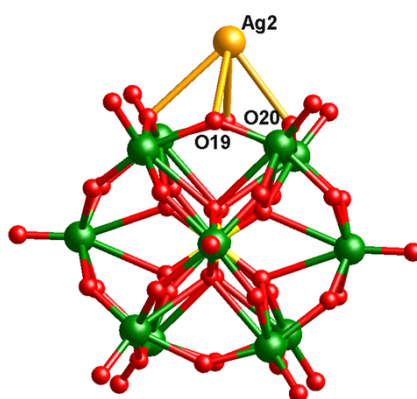

**Fig. S3** The  $\text{PMo}_{12}$  in compound **1** is a single  $\text{Ag}_2$ -capped anion.

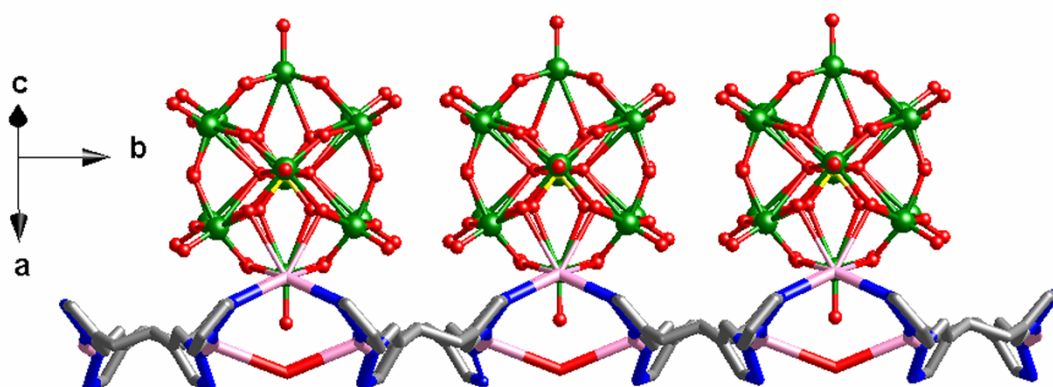

**Fig. S4** The  $\text{PMo}_{12}$  anions float on the large penta-membered Ag cycles in the 2D layer of compound **1**.

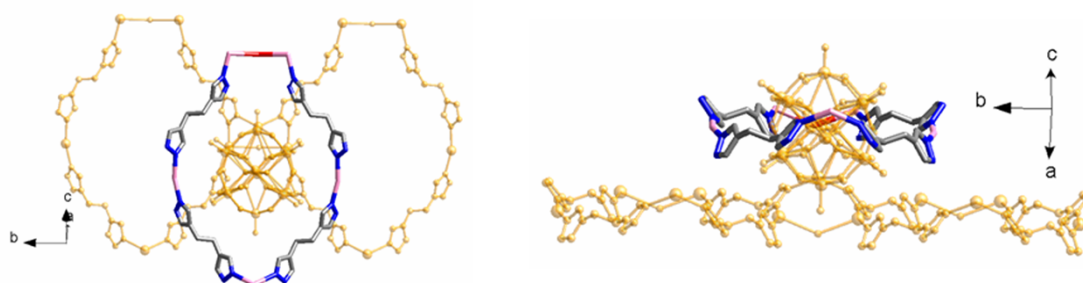

**Fig. S5** The anions insert into the cycles in adjacent 2D layers in compound **1**.

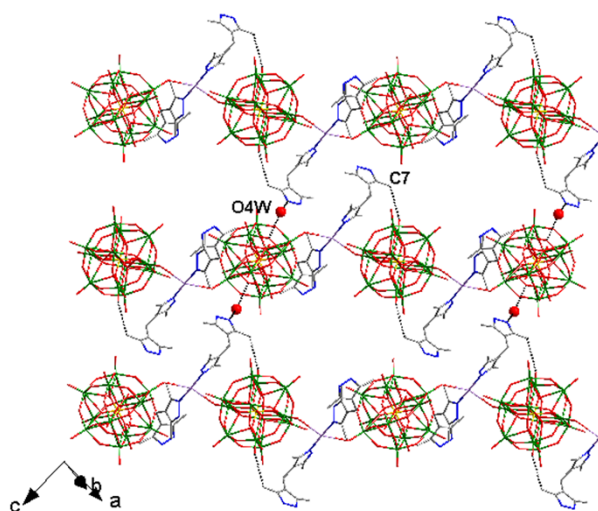

**Fig. S6** The 2D supramolecular layer of **2** induced by hydrogen bonding interactions between water molecules,  $H_2bdpm$  ligands and anions.

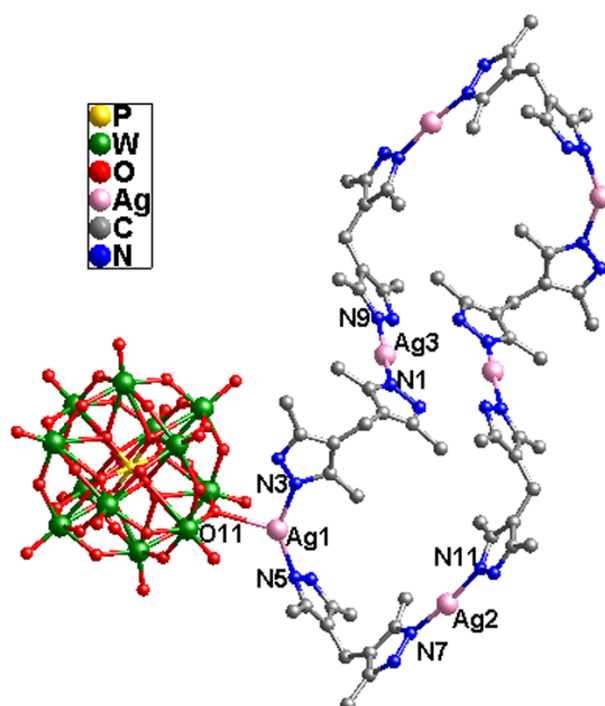

**Fig. S7** Ball/stick view of the asymmetric unit of **3**. The hydrogen atoms and crystal water molecules are omitted for clarity.

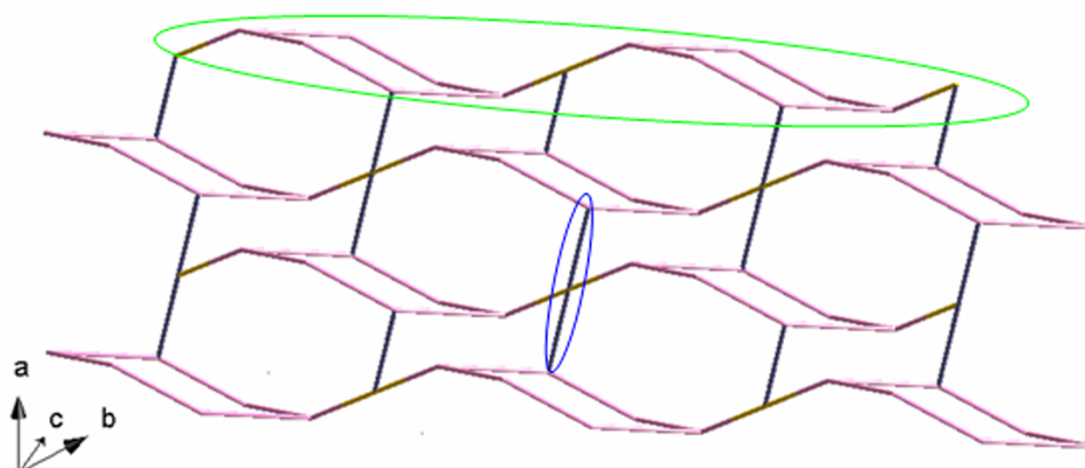

**Fig. S8** The 1D chains (in green cycle) are fused by Ag3-O bonds (in blue cycle) to form a 2D layer of compound **3**.

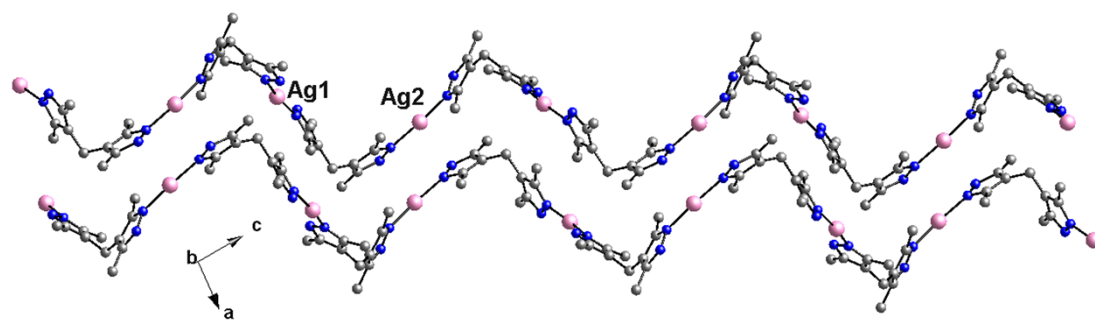

**Fig. S9** The wavy double-track chain in compound **4** containing two  $[\text{Ag}(\text{H}_2\text{bdpm})]_n^{n+}$  lines.

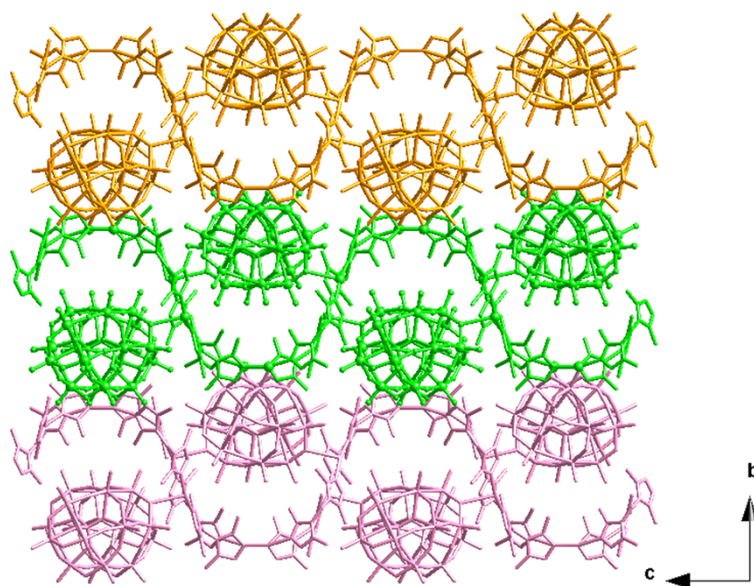

**Fig. S10** The adjacent chains are parallel to form a 2D supramolecular structure of compound 4.

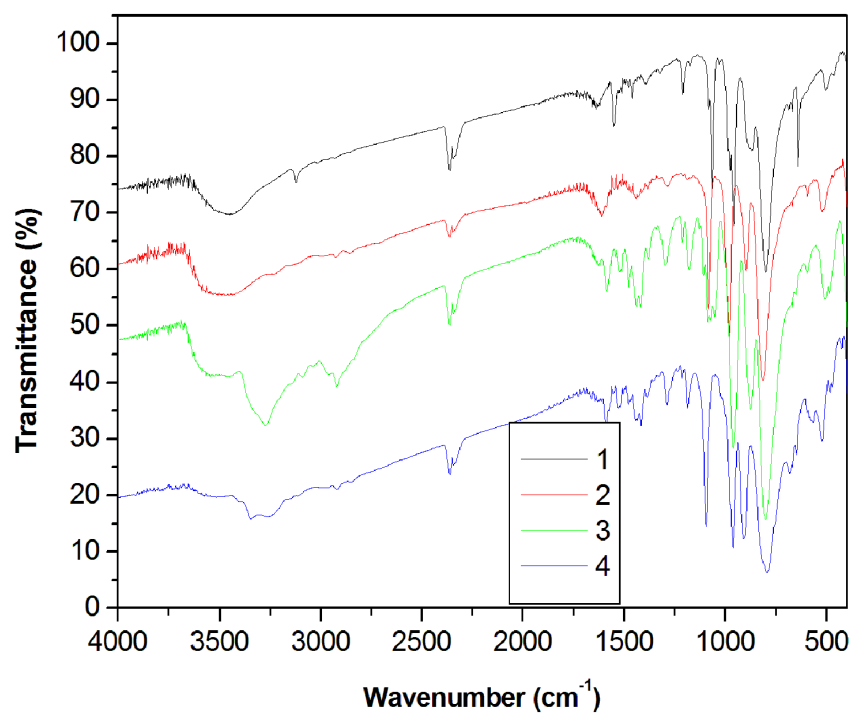

**Fig. S11** The IR spectra of compounds 1–4.

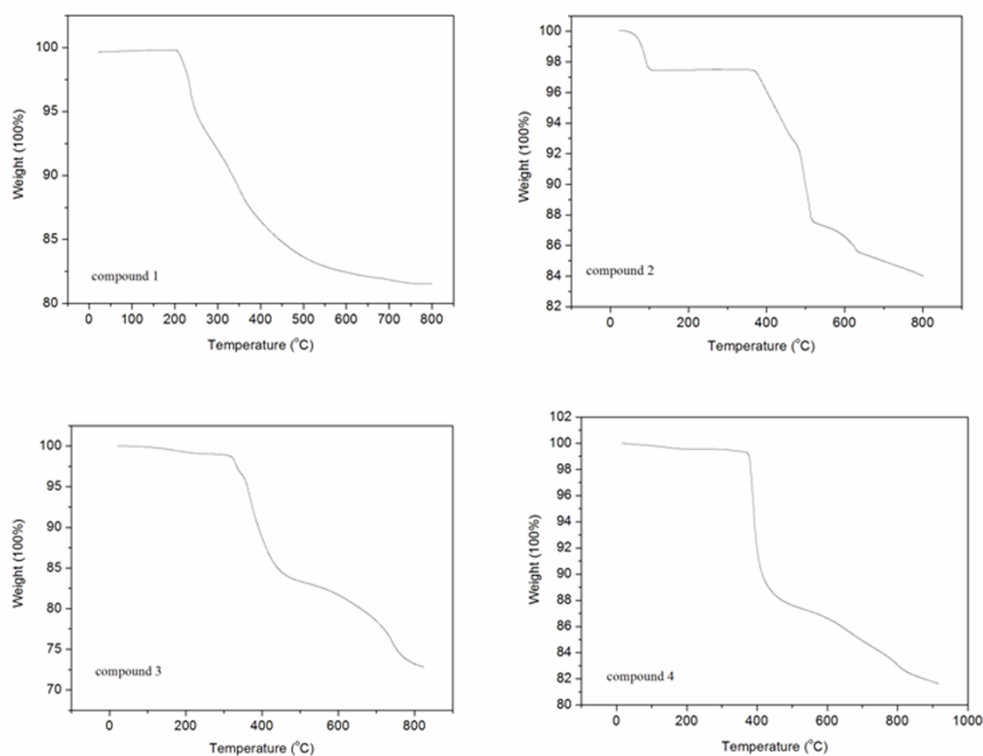

Fig. S12 The TGA curves of compounds 1–4.

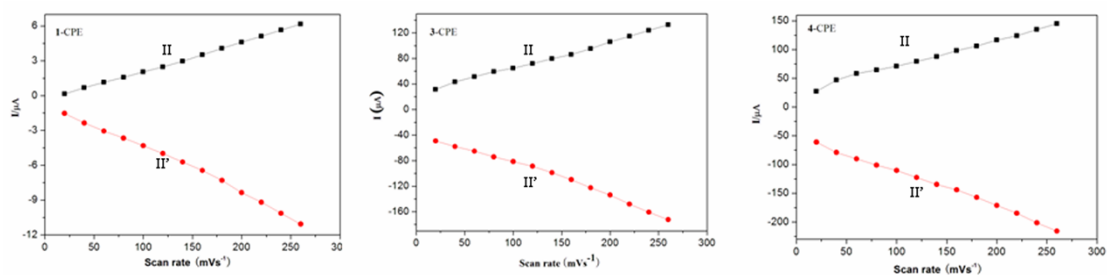

Fig. S13 The dependence of anodic peak (II) and cathodic peak (II') currents of 1–, 3– and 4–CPEs on scan rates.

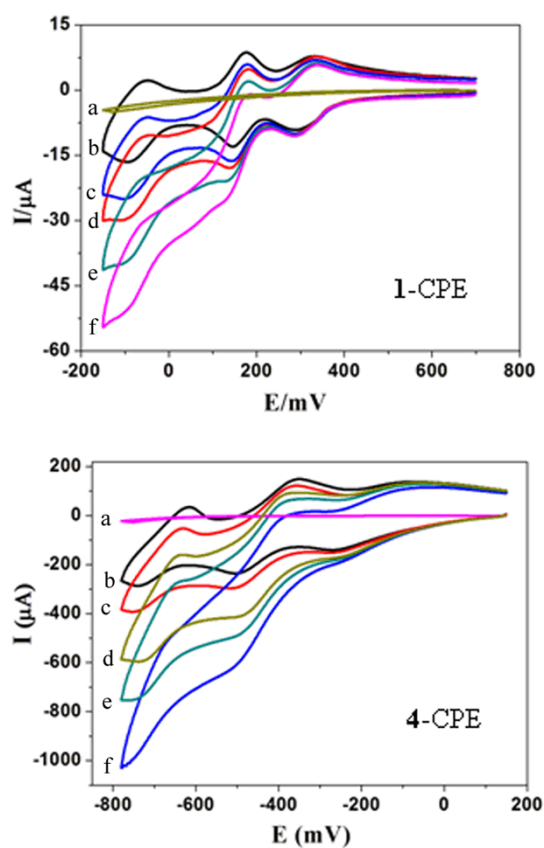

**Fig. S14** Cyclic voltammograms of the 1- and 4-CPEs in 0.1M  $\text{H}_2\text{SO}_4$  + 0.5M  $\text{Na}_2\text{SO}_4$  aqueous solution containing 0(b); 2(c); 4(d); 6(e) and 8(f) mM  $\text{H}_2\text{O}_2$  and a bare CPE (a) in a 4.0 mM  $\text{H}_2\text{O}_2$  + 0.1M  $\text{H}_2\text{SO}_4$  + 0.5M  $\text{Na}_2\text{SO}_4$  solution. Scan rate:  $200 \text{ mV}\cdot\text{s}^{-1}$ .

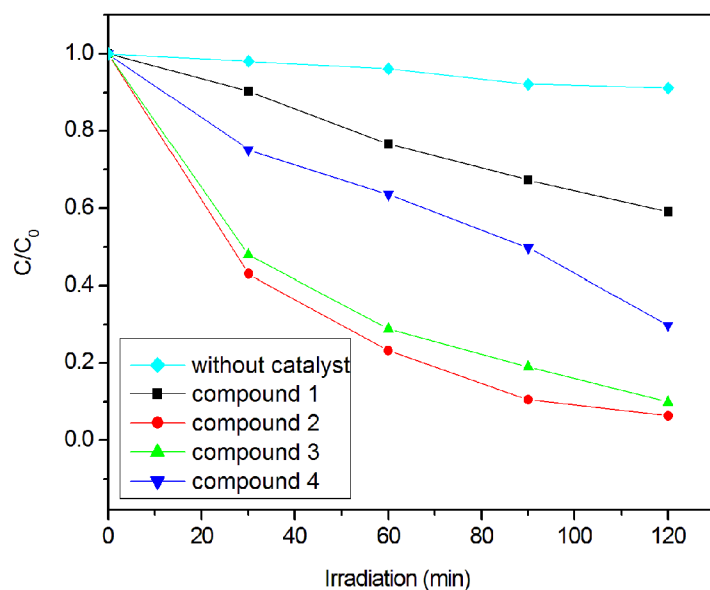

**Fig. S15** Photocatalytic decomposition rate of the MB solution under UV irradiation with the use of the title compounds and no catalyst in the same conditions.

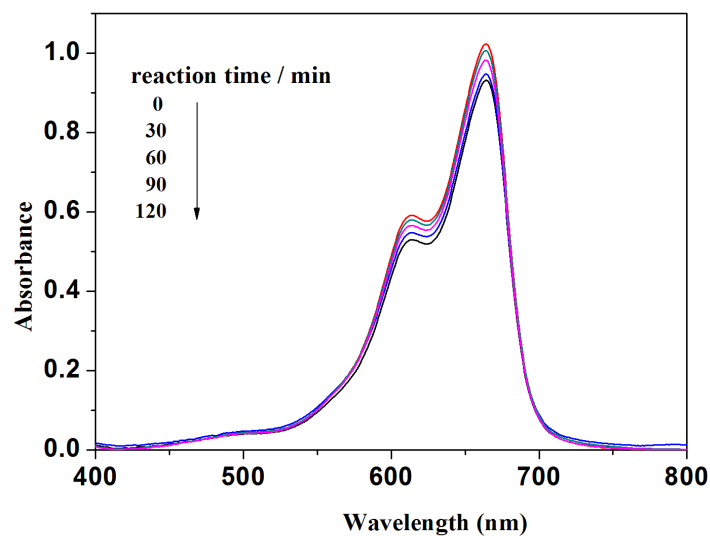

**Fig. S16** Absorption spectra of the MB solution during the decomposition reaction under UV irradiation without the presence of any title compounds.



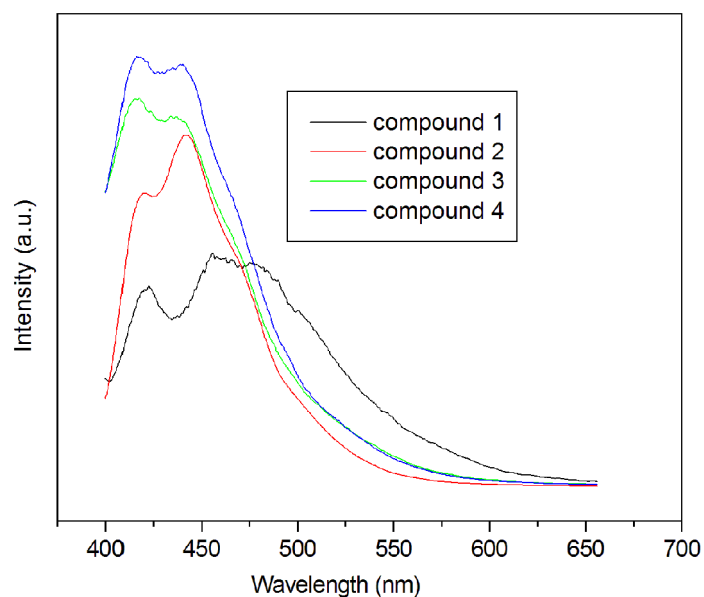

**Fig. S17** Photoluminescent spectra of **1–4** dissolved in DMSO at room temperature. Photoluminescence spectra of **1–4** dissolved in DMSO at room temperature are shown in Fig. S17. Two prominent emission peaks are observed at about 421 and 456 nm for **1**, 419 and 441 nm for **2**, 416 and 436 nm for **3** and 417 and 439 nm for **4** (excitation at 340 nm). The emission peak would be assigned to ligand-to-metal charge transfer (LMCT).

**Table S1** Selected Bond Lengths (Å) and Bond Angles (°) for Compounds **1–4**.

| Compound 1                                                                                 |           |             |            |
|--------------------------------------------------------------------------------------------|-----------|-------------|------------|
| Ag1-N1                                                                                     | 2.126(8)  | Ag1-N4      | 2.124(7)   |
| Ag1-O1W                                                                                    | 2.730(6)  | Ag2-N3      | 2.278(6)   |
| Ag2-O20                                                                                    | 2.697(7)  | Ag2-O5      | 2.908(6)   |
| N1-Ag1-N4                                                                                  | 163.9(3)  | N1-Ag1-O1W  | 98.55(2)   |
| N4-Ag1-O1W                                                                                 | 98.70(5)  | N3-Ag2-N3   | 112.1(3)   |
| Symmetry codes for <b>1</b> : #1 x,-y,z #2 x-1/2,-y-1/2,z-1 #3 x+1/2,-y-1/2,z+1            |           |             |            |
| Compound 2                                                                                 |           |             |            |
| Ag1-N3                                                                                     | 2.12(2)   | Ag1-N4      | 2.12(2)    |
| Ag1-O12                                                                                    | 2.755(5)  | Ag1-O29     | 2.803(2)   |
| N3-Ag1-N4                                                                                  | 176.5(12) | O12-Ag1-O29 | 146.30(13) |
| Symmetry codes for <b>2</b> : #1 -x-1,-y,-z #2 -x,-y+1,-z-1                                |           |             |            |
| Compound 3                                                                                 |           |             |            |
| Ag1-O11                                                                                    | 2.53(2)   | Ag1-N3      | 2.12(3)    |
| Ag1-N5                                                                                     | 2.12(2)   | Ag2-N7      | 2.090(18)  |
| Ag2-N11                                                                                    | 2.090(17) | Ag2-O14     | 2.743(10)  |
| Ag3-N1                                                                                     | 2.070(2)  | Ag3-N9      | 2.114(19)  |
| Ag3-O13                                                                                    | 2.838(15) | Ag3-O20     | 2.853(10)  |
| N3-Ag1-N5                                                                                  | 142.4(9)  | N3-Ag1-O11  | 94.6(8)    |
| N5-Ag1-O11                                                                                 | 123.0(8)  | N7-Ag2-N11  | 172.2(8)   |
| N11-Ag2-O14                                                                                | 82.05(9)  | N7-Ag2-O14  | 104.59(8)  |
| N1-Ag3-N9                                                                                  | 170.2(8)  | N9-Ag3-O13  | 111.85(5)  |
| N1-Ag3-O13                                                                                 | 77.76(8)  | N9-Ag3-O20  | 82.32(6)   |
| Symmetry codes for <b>3</b> : #1 -x+1,-y-1,-z+1 #2 -x,-y+1,-z+1                            |           |             |            |
| Compound 4                                                                                 |           |             |            |
| Ag1-N8                                                                                     | 2.056(15) | Ag1-N1      | 2.108(17)  |
| Ag1-O17                                                                                    | 2.883(15) | Ag2-N3      | 2.078(16)  |
| Ag2-N5                                                                                     | 2.091(16) | N8-Ag1-N1   | 166.2(7)   |
| N8-Ag1-O17                                                                                 | 99.88(6)  | N1-Ag1-O17  | 90.41(7)   |
| N3-Ag2-N5                                                                                  | 163.7(6)  |             |            |
| Symmetry codes for <b>4</b> : #1 -x+2,y,-z+1/2 #2 x-1/2,-y+1/2,z-1/2 #3 x+1/2,-y+1/2,z+1/2 |           |             |            |
